# Supplementary material
Source: MDPI journal article supplement (https://www.mdpi.com/2073-4433/12/3/333)
Supplement: s1 [file s1]

### Supplementary Materials:

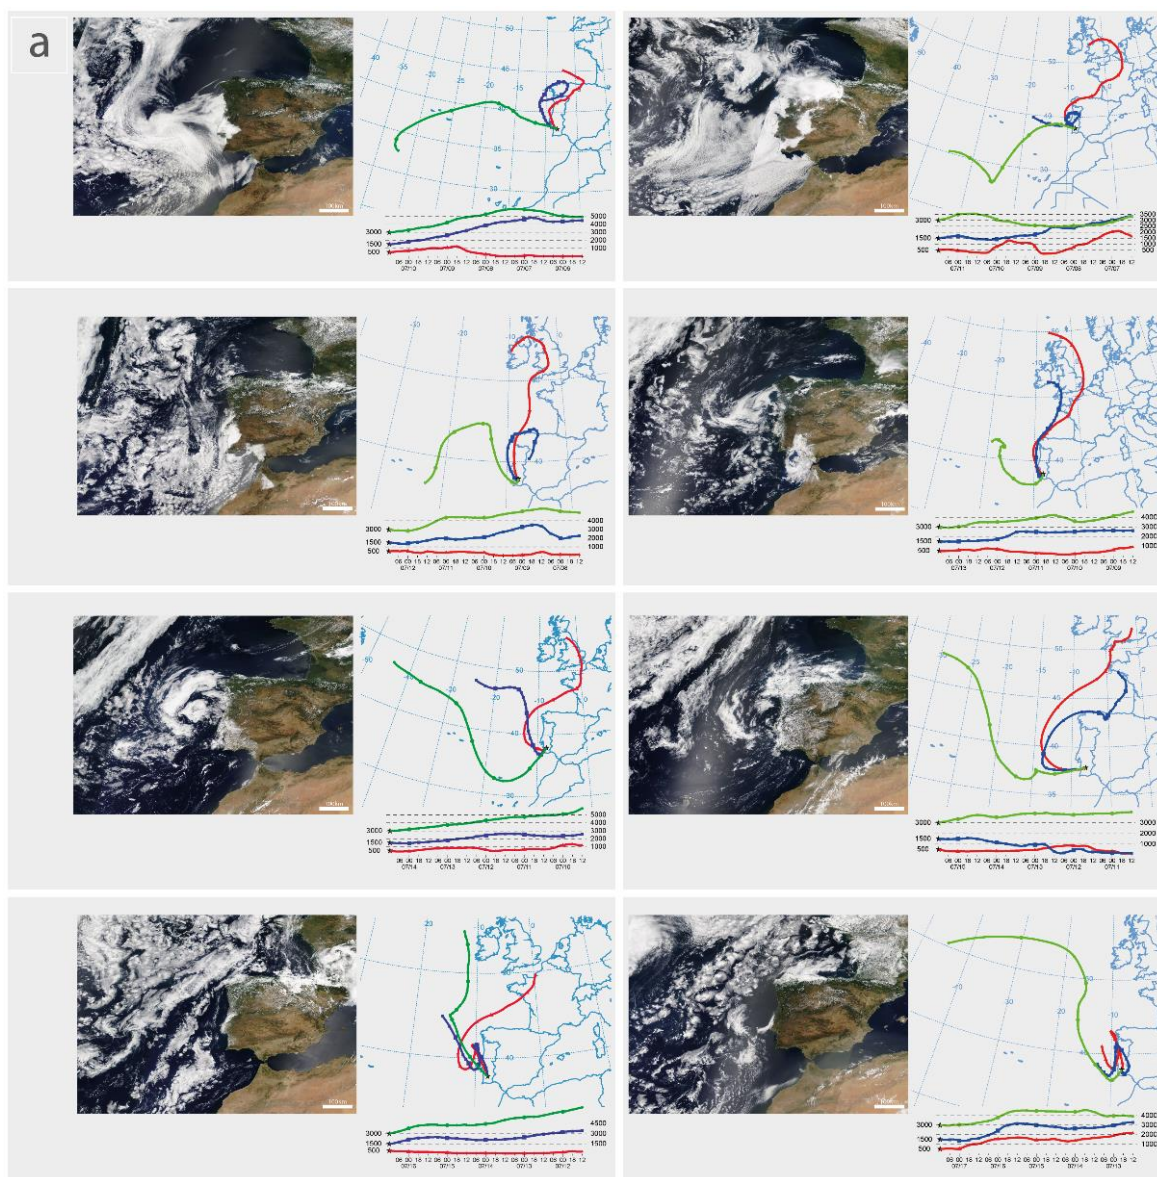

**Figure S9a.** Satellite images from the Iberian Peninsula and HYSPLIT trajectory model for each day of the first campaign [18,38].



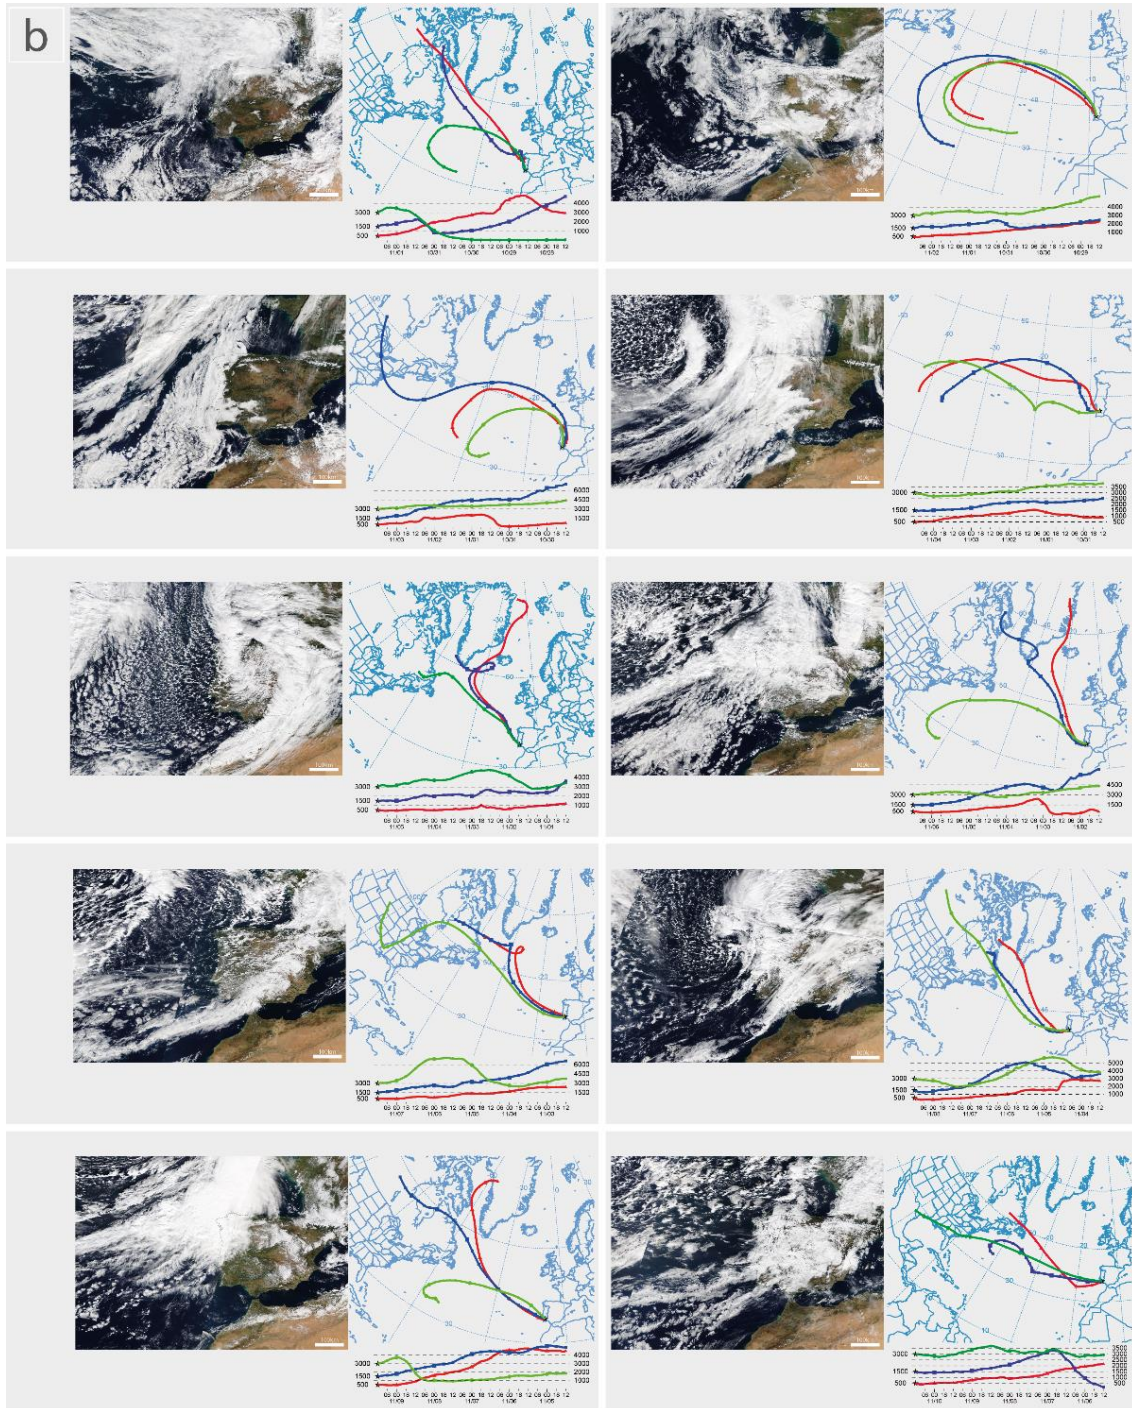

**Figure S9b.** Satellite images from the Iberian Peninsula and HYSPLIT trajectory model for each day of the second campaign [18,38].
